# Supplementary material for: Exploring the personal and professional factors associated with student evaluations of tenure-track faculty
Source: PLOS journal article supplement (doi:10.1371/journal.pone.0233515), 2020-06-03
Supplement: S19 (10.1371/journal.pone.0233515.s019) [file journal.pone.0233515.s019]

**Little evidence of multicollinearity in continuous regression model.**

Generalized and adjusted variance inflation factor scores for the regression model of overall teaching quality with continuous research indicators.

|                    | GVIF  | Df | $GVIF^{1/(2*Df)}$ |
|--------------------|-------|----|-------------------|
| Gender             | 1.115 | 1  | 1.056             |
| Scientific Age     | 2.073 | 1  | 1.440             |
| Mentions Accent    | 1.061 | 1  | 1.030             |
| Has Chili Papper   | 1.175 | 1  | 1.084             |
| Rank               | 2.029 | 2  | 1.193             |
| Difficulty         | 1.119 | 1  | 1.058             |
| Interest           | 1.120 | 1  | 1.058             |
| Mentions TA        | 1.096 | 1  | 1.047             |
| Norm. Citations    | 1.423 | 1  | 1.193             |
| Norm. Publications | 1.525 | 1  | 1.235             |
| Norm. Awards       | 1.123 | 1  | 1.060             |
| Norm. Grants       | 1.063 | 1  | 1.031             |
| Discipline         | 1.200 | 4  | 1.023             |
| Uni. Type          | 1.034 | 1  | 1.017             |
| Uni. Control       | 1.019 | 1  | 1.010             |
| Review Count       | 1.121 | 1  | 1.059             |
